# Supplementary material for: A recent shift in the Puccinia striiformis f. sp. tritici population in Serbia coincides with changes in yield losses of commercial winter wheat varieties
Source: Front Plant Sci. 2024 Oct 28;15:1464454. doi: 10.3389/fpls.2024.1464454 (PMC11550931; doi:10.3389/fpls.2024.1464454)
Supplement: Supplementary Table S1 — Details of the Pst isolates used for conducting the phylogenetic analysis. [file Table1.xlsx]

## Sheet: Sheet1
Table S1: Details of the Pst isolates used for conducting the phylogenetic analysis.
Strain	Species	Date	Region	Country	Location	Host	Genetic Group	Accession	Collector	Authors	Title	Journal	Paper URL
06/01	Pst	2006	Oceania	New Zealand	-	Sy Epson	Other	ERS1327110	Richard Oliver	Bueno-Sancho et al., 2017	Pathogenomic Analysis of Wheat Yellow Rust Lineages Detects Seasonal Variation and Host Specificity	Genome Biol Evol (12), 3282-3296 (2017)	https://academic.oup.com/gbe/article/9/12/3282/4644453
08/21	Pst	2008	Europe	UK	-	Solstice	UK 1978-2011	SRX667083	-	Hubbard et al., 2015	Field pathogenomics reveals the emergence of a diverse wheat yellow rust population	Genome Biol. (1): 23 (2015)	https://genomebiology.biomedcentral.com/articles/10.1186/s13059-015-0590-8
08/501	Pst	2008	Europe	UK	-	Timber	UK 1978-2011	SRX667388	-	Hubbard et al., 2015	Field pathogenomics reveals the emergence of a diverse wheat yellow rust population	Genome Biol. (1): 23 (2015)	https://genomebiology.biomedcentral.com/articles/10.1186/s13059-015-0590-8
11/03	Pst	2011-11-01	Oceania	New Zealand	Darfield	Morph	Other	ERS1327108	Richard Oliver	Bueno-Sancho et al., 2017	Pathogenomic Analysis of Wheat Yellow Rust Lineages Detects Seasonal Variation and Host Specificity	Genome Biol Evol (12), 3282-3296 (2017)	https://academic.oup.com/gbe/article/9/12/3282/4644453
11/08	Pst	2011	Europe	UK	Lincolnshire	Warrior	UK 1978-2011	SRX703657	-	Hubbard et al., 2015	Field pathogenomics reveals the emergence of a diverse wheat yellow rust population	Genome Biol. (1): 23 (2015)	https://genomebiology.biomedcentral.com/articles/10.1186/s13059-015-0590-8
11/13	Pst	2011	Europe	UK	-	-	UK 1978-2011	SRX708523	-	Hubbard et al., 2015	Field pathogenomics reveals the emergence of a diverse wheat yellow rust population	Genome Biol. (1): 23 (2015)	https://genomebiology.biomedcentral.com/articles/10.1186/s13059-015-0590-8
12/08	Pst	2012	Oceania	New Zealand	-	-	Other	ERS1327109	Richard Oliver	Bueno-Sancho et al., 2017	Pathogenomic Analysis of Wheat Yellow Rust Lineages Detects Seasonal Variation and Host Specificity	Genome Biol Evol (12), 3282-3296 (2017)	https://academic.oup.com/gbe/article/9/12/3282/4644453
12/12	Pst	2012-11-01	Oceania	New Zealand	Lincoln	-	Other	ERS1327107	Richard Oliver	Bueno-Sancho et al., 2017	Pathogenomic Analysis of Wheat Yellow Rust Lineages Detects Seasonal Variation and Host Specificity	Genome Biol Evol (12), 3282-3296 (2017)	https://academic.oup.com/gbe/article/9/12/3282/4644453
13/12	Pst	2013-06-05	Europe	UK	Caythorpe, Lincolnshire	RW41088	PstS10	SRX684851	-	Hubbard et al., 2015	Field pathogenomics reveals the emergence of a diverse wheat yellow rust population	Genome Biol. (1): 23 (2015)	https://genomebiology.biomedcentral.com/articles/10.1186/s13059-015-0590-8
13/120	Pst	2013-07-03	Europe	UK	Caythorpe, Lincolnshire	Ambition	PstS7	SRX702534	-	Hubbard et al., 2015	Field pathogenomics reveals the emergence of a diverse wheat yellow rust population	Genome Biol. (1): 23 (2015)	https://genomebiology.biomedcentral.com/articles/10.1186/s13059-015-0590-8
13/123	Pst	2013-07-03	Europe	UK	Boston, Lincolnshire	Ambition	PstS7	SRX702401	-	Hubbard et al., 2015	Field pathogenomics reveals the emergence of a diverse wheat yellow rust population	Genome Biol. (1): 23 (2015)	https://genomebiology.biomedcentral.com/articles/10.1186/s13059-015-0590-8
13/14	Pst	2013-06-05	Europe	UK	Boston, Lincolnshire	Ambition	PstS7	SRX684393	-	Hubbard et al., 2015	Field pathogenomics reveals the emergence of a diverse wheat yellow rust population	Genome Biol. (1): 23 (2015)	https://genomebiology.biomedcentral.com/articles/10.1186/s13059-015-0590-8
13/15	Pst	2013-06-05	Europe	UK	Mendlesham, Suffolk	Oakley	PstS10	SRX685990	-	Hubbard et al., 2015	Field pathogenomics reveals the emergence of a diverse wheat yellow rust population	Genome Biol. (1): 23 (2015)	https://genomebiology.biomedcentral.com/articles/10.1186/s13059-015-0590-8
13/18	Pst	2013-06-05	Europe	UK	Mendlesham, Suffolk	Torch	PstS7	SRX701325	-	Hubbard et al., 2015	Field pathogenomics reveals the emergence of a diverse wheat yellow rust population	Genome Biol. (1): 23 (2015)	https://genomebiology.biomedcentral.com/articles/10.1186/s13059-015-0590-8
13/19	Pst	2013-06-05	Europe	UK	Mendlesham, Suffolk	Crusoe	Cluster 3 (Hubbard et al., 2015)	SRX686005	-	Hubbard et al., 2015	Field pathogenomics reveals the emergence of a diverse wheat yellow rust population	Genome Biol. (1): 23 (2015)	https://genomebiology.biomedcentral.com/articles/10.1186/s13059-015-0590-8
13/20	Pst	2013-06-06	Europe	UK	Sutton Scotney, Hampshire	LGW56 (Panacea)	PstS7	SRX690338	-	Hubbard et al., 2015	Field pathogenomics reveals the emergence of a diverse wheat yellow rust population	Genome Biol. (1): 23 (2015)	https://genomebiology.biomedcentral.com/articles/10.1186/s13059-015-0590-8
13/22	Pst	2013-06-13	Europe	UK	Boothby Graffoe, Lincolnshire	Solstice	PstS10	SRX684439	-	Hubbard et al., 2015	Field pathogenomics reveals the emergence of a diverse wheat yellow rust population	Genome Biol. (1): 23 (2015)	https://genomebiology.biomedcentral.com/articles/10.1186/s13059-015-0590-8
13/24	Pst	2013-06-13	Europe	UK	Boothby Graffoe, Lincolnshire	KWS Kielder	PstS10	SRX690311	-	Hubbard et al., 2015	Field pathogenomics reveals the emergence of a diverse wheat yellow rust population	Genome Biol. (1): 23 (2015)	https://genomebiology.biomedcentral.com/articles/10.1186/s13059-015-0590-8
13/25	Pst	2013-06-13	Europe	UK	Boothby Graffoe, Lincolnshire	KWS Dali	PstS10	SRX685991	-	Hubbard et al., 2015	Field pathogenomics reveals the emergence of a diverse wheat yellow rust population	Genome Biol. (1): 23 (2015)	https://genomebiology.biomedcentral.com/articles/10.1186/s13059-015-0590-8
13/26	Pst	2013-06-12	Europe	UK	Cirencester, Gloucestershire	Horatio	PstS7	SRX686006	-	Hubbard et al., 2015	Field pathogenomics reveals the emergence of a diverse wheat yellow rust population	Genome Biol. (1): 23 (2015)	https://genomebiology.biomedcentral.com/articles/10.1186/s13059-015-0590-8
13/27	Pst	2013-06-12	Europe	UK	Cirencester, Gloucestershire	Oakley	PstS7	SRX684252	-	Hubbard et al., 2015	Field pathogenomics reveals the emergence of a diverse wheat yellow rust population	Genome Biol. (1): 23 (2015)	https://genomebiology.biomedcentral.com/articles/10.1186/s13059-015-0590-8
13/28	Pst	2013-06-12	Europe	UK	Cirencester, Gloucestershire	Solstice	PstS10	SRX690352	-	Hubbard et al., 2015	Field pathogenomics reveals the emergence of a diverse wheat yellow rust population	Genome Biol. (1): 23 (2015)	https://genomebiology.biomedcentral.com/articles/10.1186/s13059-015-0590-8
13/29	Pst	2013-06-14	Europe	UK	Oxfordshire	Solstice	PstS10	SRX685190	-	Hubbard et al., 2015	Field pathogenomics reveals the emergence of a diverse wheat yellow rust population	Genome Biol. (1): 23 (2015)	https://genomebiology.biomedcentral.com/articles/10.1186/s13059-015-0590-8
13/30	Pst	2013-06-14	Europe	UK	Welbourne, Lincolnshire	Solstice	Cluster 3 (Hubbard et al., 2015)	SRX690343	-	Hubbard et al., 2015	Field pathogenomics reveals the emergence of a diverse wheat yellow rust population	Genome Biol. (1): 23 (2015)	https://genomebiology.biomedcentral.com/articles/10.1186/s13059-015-0590-8
13/32	Pst	2013-06-14	Europe	UK	Welbourne, Lincolnshire	ReR04	PstS10	SRX690312	-	Hubbard et al., 2015	Field pathogenomics reveals the emergence of a diverse wheat yellow rust population	Genome Biol. (1): 23 (2015)	https://genomebiology.biomedcentral.com/articles/10.1186/s13059-015-0590-8
13/34	Pst	2013-06-14	Europe	UK	Welbourne, Lincolnshire	ReR32	PstS10	SRX686004	-	Hubbard et al., 2015	Field pathogenomics reveals the emergence of a diverse wheat yellow rust population	Genome Biol. (1): 23 (2015)	https://genomebiology.biomedcentral.com/articles/10.1186/s13059-015-0590-8
13/35	Pst	2013-06-14	Europe	UK	Welbourne, Lincolnshire	ReR64	PstS10	SRX690541	-	Hubbard et al., 2015	Field pathogenomics reveals the emergence of a diverse wheat yellow rust population	Genome Biol. (1): 23 (2015)	https://genomebiology.biomedcentral.com/articles/10.1186/s13059-015-0590-8
13/36	Pst	2013-06-14	Europe	UK	Welbourne, Lincolnshire	Allez-Y	PstS10	SRX690378	-	Hubbard et al., 2015	Field pathogenomics reveals the emergence of a diverse wheat yellow rust population	Genome Biol. (1): 23 (2015)	https://genomebiology.biomedcentral.com/articles/10.1186/s13059-015-0590-8
13/37	Pst	2013-06-14	Europe	UK	Welbourne, Lincolnshire	ReR110	PstS10	SRX701334	-	Hubbard et al., 2015	Field pathogenomics reveals the emergence of a diverse wheat yellow rust population	Genome Biol. (1): 23 (2015)	https://genomebiology.biomedcentral.com/articles/10.1186/s13059-015-0590-8
13/38	Pst	2013-06-14	Europe	UK	Welbourne, Lincolnshire	ReR138	Cluster 3 (Hubbard et al., 2015)	SRX690348	-	Hubbard et al., 2015	Field pathogenomics reveals the emergence of a diverse wheat yellow rust population	Genome Biol. (1): 23 (2015)	https://genomebiology.biomedcentral.com/articles/10.1186/s13059-015-0590-8
13/39	Pst	2013-06-14	Europe	UK	Welbourne, Lincolnshire	Toisandor	PstS10	SRX690379	-	Hubbard et al., 2015	Field pathogenomics reveals the emergence of a diverse wheat yellow rust population	Genome Biol. (1): 23 (2015)	https://genomebiology.biomedcentral.com/articles/10.1186/s13059-015-0590-8
13/40	Pst	2013-06-14	Europe	UK	Welbourne, Lincolnshire	Fairplay	PstS10	SRX690528	-	Hubbard et al., 2015	Field pathogenomics reveals the emergence of a diverse wheat yellow rust population	Genome Biol. (1): 23 (2015)	https://genomebiology.biomedcentral.com/articles/10.1186/s13059-015-0590-8
13/520	Pst	2013-07-07	Europe	UK	NIAB HQ, Cambridgeshire	Warrior	PstS7	SRX701336	-	Hubbard et al., 2015	Field pathogenomics reveals the emergence of a diverse wheat yellow rust population	Genome Biol. (1): 23 (2015)	https://genomebiology.biomedcentral.com/articles/10.1186/s13059-015-0590-8
13/65	Pst	2013-06-18	Europe	UK	Cambridgeshire	Claire	PstS7	SRX684850	-	Hubbard et al., 2015	Field pathogenomics reveals the emergence of a diverse wheat yellow rust population	Genome Biol. (1): 23 (2015)	https://genomebiology.biomedcentral.com/articles/10.1186/s13059-015-0590-8
13/71	Pst	2013-06-19	Europe	UK	Headley Hall, North Yorkshire	Laurier	PstS10	SRX690483	-	Hubbard et al., 2015	Field pathogenomics reveals the emergence of a diverse wheat yellow rust population	Genome Biol. (1): 23 (2015)	https://genomebiology.biomedcentral.com/articles/10.1186/s13059-015-0590-8
14.0009	Pst	2014-05-22	Europe	Austria	Gießhübl	Sax	PstS7	ERS1327126	Susanne Kirchmaier	Bueno-Sancho et al., 2017	Pathogenomic Analysis of Wheat Yellow Rust Lineages Detects Seasonal Variation and Host Specificity	Genome Biol Evol (12), 3282-3296 (2017)	https://academic.oup.com/gbe/article/9/12/3282/4644453
14.0010	Pst	2014-05-22	Europe	Poland	Choryn	-	Triticale	ERS1327127	Zofia Banaszak	Bueno-Sancho et al., 2017	Pathogenomic Analysis of Wheat Yellow Rust Lineages Detects Seasonal Variation and Host Specificity	Genome Biol Evol (12), 3282-3296 (2017)	https://academic.oup.com/gbe/article/9/12/3282/4644453
14.0011	Pst	2014-05-13	Europe	Croatia	-	-	PstS7	ERS1327128	Alison Bentley	Bueno-Sancho et al., 2017	Pathogenomic Analysis of Wheat Yellow Rust Lineages Detects Seasonal Variation and Host Specificity	Genome Biol Evol (12), 3282-3296 (2017)	https://academic.oup.com/gbe/article/9/12/3282/4644453
14.0014	Pst	2014-06-02	Europe	France	Gourhel	Altigo	PstS10	ERS1327129	Grellier	Bueno-Sancho et al., 2017	Pathogenomic Analysis of Wheat Yellow Rust Lineages Detects Seasonal Variation and Host Specificity	Genome Biol Evol (12), 3282-3296 (2017)	https://academic.oup.com/gbe/article/9/12/3282/4644453
14.0015	Pst	2014-06-04	Europe	France	Guegon	Expert	PstS7	ERS1327130	Grellier	Bueno-Sancho et al., 2017	Pathogenomic Analysis of Wheat Yellow Rust Lineages Detects Seasonal Variation and Host Specificity	Genome Biol Evol (12), 3282-3296 (2017)	https://academic.oup.com/gbe/article/9/12/3282/4644453
14.0016	Pst	2014-06-04	Europe	France	Loyat	Alixan	PstS10	ERS1327131	Grellier	Bueno-Sancho et al., 2017	Pathogenomic Analysis of Wheat Yellow Rust Lineages Detects Seasonal Variation and Host Specificity	Genome Biol Evol (12), 3282-3296 (2017)	https://academic.oup.com/gbe/article/9/12/3282/4644453
14.0017	Pst	2014-02-21	Europe	UK	Sutton Scotney, Hampshire	Victo	PstS10	ERS1327132	Amelia Hubbard	Bueno-Sancho et al., 2017	Pathogenomic Analysis of Wheat Yellow Rust Lineages Detects Seasonal Variation and Host Specificity	Genome Biol Evol (12), 3282-3296 (2017)	https://academic.oup.com/gbe/article/9/12/3282/4644453
14.0018	Pst	2014-02-21	Europe	UK	Sutton Scotney, Hampshire	Oakley	PstS10	ERS1327133	Amelia Hubbard	Bueno-Sancho et al., 2017	Pathogenomic Analysis of Wheat Yellow Rust Lineages Detects Seasonal Variation and Host Specificity	Genome Biol Evol (12), 3282-3296 (2017)	https://academic.oup.com/gbe/article/9/12/3282/4644453
14.0019	Pst	2014-03-07	Europe	UK	-	Panorama	PstS10	ERS1327134	Amelia Hubbard	Bueno-Sancho et al., 2017	Pathogenomic Analysis of Wheat Yellow Rust Lineages Detects Seasonal Variation and Host Specificity	Genome Biol Evol (12), 3282-3296 (2017)	https://academic.oup.com/gbe/article/9/12/3282/4644453
14.0020	Pst	2014-03-07	Europe	UK	-	Target	PstS10	ERS1327135	Amelia Hubbard	Bueno-Sancho et al., 2017	Pathogenomic Analysis of Wheat Yellow Rust Lineages Detects Seasonal Variation and Host Specificity	Genome Biol Evol (12), 3282-3296 (2017)	https://academic.oup.com/gbe/article/9/12/3282/4644453
14.0026	Pst	2014-06-06	Europe	Poland	Sroda Wielko	Legenda	PstS7	ERS1327141	Szymon Laczny	Bueno-Sancho et al., 2017	Pathogenomic Analysis of Wheat Yellow Rust Lineages Detects Seasonal Variation and Host Specificity	Genome Biol Evol (12), 3282-3296 (2017)	https://academic.oup.com/gbe/article/9/12/3282/4644453
14.0027	Pst	2014-06-06	Europe	Poland	Sroda Wielko	Princeps	PstS8	ERS1327111	Szymon Laczny	Bueno-Sancho et al., 2017	Pathogenomic Analysis of Wheat Yellow Rust Lineages Detects Seasonal Variation and Host Specificity	Genome Biol Evol (12), 3282-3296 (2017)	https://academic.oup.com/gbe/article/9/12/3282/4644453
14.0029	Pst	2014-05-16	Africa	Ethiopia	Kulumsa, Oromia	-	Other	ERS1327112	Dave Hodson	Bueno-Sancho et al., 2017	Pathogenomic Analysis of Wheat Yellow Rust Lineages Detects Seasonal Variation and Host Specificity	Genome Biol Evol (12), 3282-3296 (2017)	https://academic.oup.com/gbe/article/9/12/3282/4644453
14.0030	Pst	2014-05-16	Africa	Ethiopia	Kulumsa, Oromia	-	Other	ERS1327112	Dave Hodson	Bueno-Sancho et al., 2017	Pathogenomic Analysis of Wheat Yellow Rust Lineages Detects Seasonal Variation and Host Specificity	Genome Biol Evol (12), 3282-3296 (2017)	https://academic.oup.com/gbe/article/9/12/3282/4644453
14.0035	Pst	2014-06-10	Europe	Germany	Moselsürsch	Akteur	PstS10	ERS1327142	Prochnow: Rosie Bryson	Bueno-Sancho et al., 2017	Pathogenomic Analysis of Wheat Yellow Rust Lineages Detects Seasonal Variation and Host Specificity	Genome Biol Evol (12), 3282-3296 (2017)	https://academic.oup.com/gbe/article/9/12/3282/4644453
14.0039	Pst	2014-06-16	Europe	Germany	Hingste	Opal	PstS10	ERS1327145	Prochnow: Rosie Bryson	Bueno-Sancho et al., 2017	Pathogenomic Analysis of Wheat Yellow Rust Lineages Detects Seasonal Variation and Host Specificity	Genome Biol Evol (12), 3282-3296 (2017)	https://academic.oup.com/gbe/article/9/12/3282/4644453
14.0040	Pst	2014-06-16	Europe	Germany	Hingste	Akteur	PstS10	ERS1327146	Prochnow: Rosie Bryson	Bueno-Sancho et al., 2017	Pathogenomic Analysis of Wheat Yellow Rust Lineages Detects Seasonal Variation and Host Specificity	Genome Biol Evol (12), 3282-3296 (2017)	https://academic.oup.com/gbe/article/9/12/3282/4644453
14.0046	Pst	2014-06-25	Europe	France	Bucy-Saint-Liphard	Hysun	PstS10	ERS1327151	Hamon	Bueno-Sancho et al., 2017	Pathogenomic Analysis of Wheat Yellow Rust Lineages Detects Seasonal Variation and Host Specificity	Genome Biol Evol (12), 3282-3296 (2017)	https://academic.oup.com/gbe/article/9/12/3282/4644453
14.0047	Pst	2014-06-25	Europe	France	Bucy-Saint-Liphard	Karur	PstS10	ERS1327152	Hamon	Bueno-Sancho et al., 2017	Pathogenomic Analysis of Wheat Yellow Rust Lineages Detects Seasonal Variation and Host Specificity	Genome Biol Evol (12), 3282-3296 (2017)	https://academic.oup.com/gbe/article/9/12/3282/4644453
14.0059	Pst	2014-06-19	Europe	Czech Republic	Olomouc	Perenial grass	PstS7	ERS1327153	Ruth Bryant	Bueno-Sancho et al., 2017	Pathogenomic Analysis of Wheat Yellow Rust Lineages Detects Seasonal Variation and Host Specificity	Genome Biol Evol (12), 3282-3296 (2017)	https://academic.oup.com/gbe/article/9/12/3282/4644453
14.0060	Pst	2014-06-19	Europe	Czech Republic	Olomouc	NIC08-108	PstS7	ERS1327154	Ruth Bryant	Bueno-Sancho et al., 2017	Pathogenomic Analysis of Wheat Yellow Rust Lineages Detects Seasonal Variation and Host Specificity	Genome Biol Evol (12), 3282-3296 (2017)	https://academic.oup.com/gbe/article/9/12/3282/4644453
14.0062	Pst	2014-06-23	Europe	France	Druelle	- Triticale	Triticale	ERS1327156	Ruth Bryant	Bueno-Sancho et al., 2017	Pathogenomic Analysis of Wheat Yellow Rust Lineages Detects Seasonal Variation and Host Specificity	Genome Biol Evol (12), 3282-3296 (2017)	https://academic.oup.com/gbe/article/9/12/3282/4644453
14.0069	Pst	2014-06-11	Europe	Bulgaria	Novi Han	Enola	PstS7	ERS1327157	Todor Manslov	Bueno-Sancho et al., 2017	Pathogenomic Analysis of Wheat Yellow Rust Lineages Detects Seasonal Variation and Host Specificity	Genome Biol Evol (12), 3282-3296 (2017)	https://academic.oup.com/gbe/article/9/12/3282/4644453
14.0072	Pst	2014-07-03	Europe	Spain	Garinoain	Trigo camargo	PstS7	ERS1327158	Pedro Liberol	Bueno-Sancho et al., 2017	Pathogenomic Analysis of Wheat Yellow Rust Lineages Detects Seasonal Variation and Host Specificity	Genome Biol Evol (12), 3282-3296 (2017)	https://academic.oup.com/gbe/article/9/12/3282/4644453
14.0076	Pst	2014-05-21	Europe	Italy	Ozzano, Bologna	Massari	PstS7	ERS1327159	A. Resweber	Bueno-Sancho et al., 2017	Pathogenomic Analysis of Wheat Yellow Rust Lineages Detects Seasonal Variation and Host Specificity	Genome Biol Evol (12), 3282-3296 (2017)	https://academic.oup.com/gbe/article/9/12/3282/4644453
14.0080	Pst	2014-06-17	Europe	Germany	Ruchheim	Victo	Other	ERS3173007	A. Resweber	Bueno-Sancho et al., 2017	Pathogenomic Analysis of Wheat Yellow Rust Lineages Detects Seasonal Variation and Host Specificity	Genome Biol Evol (12), 3282-3296 (2017)	https://academic.oup.com/gbe/article/9/12/3282/4644453
14.0085	Pst	2014-06-03	Europe	Germany	Groitzsch	Akteur	PstS10	ERS1327165	Prochnow	Bueno-Sancho et al., 2017	Pathogenomic Analysis of Wheat Yellow Rust Lineages Detects Seasonal Variation and Host Specificity	Genome Biol Evol (12), 3282-3296 (2017)	https://academic.oup.com/gbe/article/9/12/3282/4644453
14.0086	Pst	2014-06-03	Europe	Germany	Weißensee	Ritmo	PstS10	ERS1327166	Prochnow	Bueno-Sancho et al., 2017	Pathogenomic Analysis of Wheat Yellow Rust Lineages Detects Seasonal Variation and Host Specificity	Genome Biol Evol (12), 3282-3296 (2017)	https://academic.oup.com/gbe/article/9/12/3282/4644453
14.0087	Pst	2014-06-03	Europe	Germany	Weißensee	JB Asano	PstS10	ERS1327167	Prochnow	Bueno-Sancho et al., 2017	Pathogenomic Analysis of Wheat Yellow Rust Lineages Detects Seasonal Variation and Host Specificity	Genome Biol Evol (12), 3282-3296 (2017)	https://academic.oup.com/gbe/article/9/12/3282/4644453
14.0088	Pst	2014-06-03	Europe	Germany	Weißensee	Akteur	PstS10	ERS1327168	Prochnow	Bueno-Sancho et al., 2017	Pathogenomic Analysis of Wheat Yellow Rust Lineages Detects Seasonal Variation and Host Specificity	Genome Biol Evol (12), 3282-3296 (2017)	https://academic.oup.com/gbe/article/9/12/3282/4644453
14.0089	Pst	2014-06-04	Europe	Germany	Dechenhausen	Kometus	PstS10	ERS1327169	Prochnow	Bueno-Sancho et al., 2017	Pathogenomic Analysis of Wheat Yellow Rust Lineages Detects Seasonal Variation and Host Specificity	Genome Biol Evol (12), 3282-3296 (2017)	https://academic.oup.com/gbe/article/9/12/3282/4644453
14.0090	Pst	2014-06-05	Europe	Germany	Hottendorf	Hermann	PstS10	ERS1327170	Prochnow	Bueno-Sancho et al., 2017	Pathogenomic Analysis of Wheat Yellow Rust Lineages Detects Seasonal Variation and Host Specificity	Genome Biol Evol (12), 3282-3296 (2017)	https://academic.oup.com/gbe/article/9/12/3282/4644453
14.0092	Pst	2014-05-26	Europe	Slovakia	Detva	-	PstS7	ERS1327172	Andrea Hankov√°	Bueno-Sancho et al., 2017	Pathogenomic Analysis of Wheat Yellow Rust Lineages Detects Seasonal Variation and Host Specificity	Genome Biol Evol (12), 3282-3296 (2017)	https://academic.oup.com/gbe/article/9/12/3282/4644453
14.0093	Pst	2014-05-26	Europe	Slovakia	Detva	-	PstS7	ERS1327173	Andrea Hankov√°	Bueno-Sancho et al., 2017	Pathogenomic Analysis of Wheat Yellow Rust Lineages Detects Seasonal Variation and Host Specificity	Genome Biol Evol (12), 3282-3296 (2017)	https://academic.oup.com/gbe/article/9/12/3282/4644453
14.0095	Pst	2014-06-02	Europe	Belgium	Koksijde	JB Asano	PstS10	ERS1327175	Yves Decroos	Bueno-Sancho et al., 2017	Pathogenomic Analysis of Wheat Yellow Rust Lineages Detects Seasonal Variation and Host Specificity	Genome Biol Evol (12), 3282-3296 (2017)	https://academic.oup.com/gbe/article/9/12/3282/4644453
14.0096	Pst	2014-06-02	Europe	Belgium	Zwevegem	JB Asano	PstS10	ERS1327176	Yves Decroos	Bueno-Sancho et al., 2017	Pathogenomic Analysis of Wheat Yellow Rust Lineages Detects Seasonal Variation and Host Specificity	Genome Biol Evol (12), 3282-3296 (2017)	https://academic.oup.com/gbe/article/9/12/3282/4644453
14.0097	Pst	2014-06-02	Europe	Belgium	Tiegem	JB Asano	PstS10	ERS1327177	Yves Decroos	Bueno-Sancho et al., 2017	Pathogenomic Analysis of Wheat Yellow Rust Lineages Detects Seasonal Variation and Host Specificity	Genome Biol Evol (12), 3282-3296 (2017)	https://academic.oup.com/gbe/article/9/12/3282/4644453
14.0103	Pst	2014-05-24	Europe	Serbia	-	-	PstS7	ERS1327181	Dario	Bueno-Sancho et al., 2017	Pathogenomic Analysis of Wheat Yellow Rust Lineages Detects Seasonal Variation and Host Specificity	Genome Biol Evol (12), 3282-3296 (2017)	https://academic.oup.com/gbe/article/9/12/3282/4644453
14.0115	Pst	2014-07-01	Europe	Germany	Werbig	Rye	Triticale	ERS1327184	Viktor	Bueno-Sancho et al., 2017	Pathogenomic Analysis of Wheat Yellow Rust Lineages Detects Seasonal Variation and Host Specificity	Genome Biol Evol (12), 3282-3296 (2017)	https://academic.oup.com/gbe/article/9/12/3282/4644453
14.0120	Pst	2014-07-01	Europe	Germany	Werbig	Rye	Triticale	ERS1327185	Viktor	Bueno-Sancho et al., 2017	Pathogenomic Analysis of Wheat Yellow Rust Lineages Detects Seasonal Variation and Host Specificity	Genome Biol Evol (12), 3282-3296 (2017)	https://academic.oup.com/gbe/article/9/12/3282/4644453
14.0135	Pst	2014-06-23	Europe	UK	Humbie, East Lothian	KWS Kielder	PstS10	ERS1327190	-	Bueno-Sancho et al., 2017	Pathogenomic Analysis of Wheat Yellow Rust Lineages Detects Seasonal Variation and Host Specificity	Genome Biol Evol (12), 3282-3296 (2017)	https://academic.oup.com/gbe/article/9/12/3282/4644453
14.0159	Pst	2014-01-23	Europe	UK	Caythorpe, Lincolnshire	Claire	PstS10	ERS1327203	-	Bueno-Sancho et al., 2017	Pathogenomic Analysis of Wheat Yellow Rust Lineages Detects Seasonal Variation and Host Specificity	Genome Biol Evol (12), 3282-3296 (2017)	https://academic.oup.com/gbe/article/9/12/3282/4644453
14.0160	Pst	2014-01-23	Europe	UK	Caythorpe, Lincolnshire	Robigus	PstS10	ERS1327204	-	Bueno-Sancho et al., 2017	Pathogenomic Analysis of Wheat Yellow Rust Lineages Detects Seasonal Variation and Host Specificity	Genome Biol Evol (12), 3282-3296 (2017)	https://academic.oup.com/gbe/article/9/12/3282/4644453
14.0163	Pst	2014-05-23	Europe	UK	Canterbury, Kent	Cordiale	PstS10	ERS1327205	-	Bueno-Sancho et al., 2017	Pathogenomic Analysis of Wheat Yellow Rust Lineages Detects Seasonal Variation and Host Specificity	Genome Biol Evol (12), 3282-3296 (2017)	https://academic.oup.com/gbe/article/9/12/3282/4644453
14.0165	Pst	2014-05-23	Europe	UK	Canterbury, Kent	Solstice	PstS10	ERS1327206	-	Bueno-Sancho et al., 2017	Pathogenomic Analysis of Wheat Yellow Rust Lineages Detects Seasonal Variation and Host Specificity	Genome Biol Evol (12), 3282-3296 (2017)	https://academic.oup.com/gbe/article/9/12/3282/4644453
14.0166	Pst	2014-05-06	Europe	UK	Caythorpe, Lincolnshire	Solstice	PstS10	ERS1327207	-	Bueno-Sancho et al., 2017	Pathogenomic Analysis of Wheat Yellow Rust Lineages Detects Seasonal Variation and Host Specificity	Genome Biol Evol (12), 3282-3296 (2017)	https://academic.oup.com/gbe/article/9/12/3282/4644453
14.0167	Pst	2014-05-06	Europe	UK	Caythorpe, Lincolnshire	Robigus	PstS10	ERS1327208	-	Bueno-Sancho et al., 2017	Pathogenomic Analysis of Wheat Yellow Rust Lineages Detects Seasonal Variation and Host Specificity	Genome Biol Evol (12), 3282-3296 (2017)	https://academic.oup.com/gbe/article/9/12/3282/4644453
14.0169	Pst	2014-05-16	Europe	UK	-	Ambition	PstS7	ERS1327209	-	Bueno-Sancho et al., 2017	Pathogenomic Analysis of Wheat Yellow Rust Lineages Detects Seasonal Variation and Host Specificity	Genome Biol Evol (12), 3282-3296 (2017)	https://academic.oup.com/gbe/article/9/12/3282/4644453
14.0172	Pst	2014-05-13	Europe	UK	Great Dunmow	Scout	PstS10	ERS1327210	-	Bueno-Sancho et al., 2017	Pathogenomic Analysis of Wheat Yellow Rust Lineages Detects Seasonal Variation and Host Specificity	Genome Biol Evol (12), 3282-3296 (2017)	https://academic.oup.com/gbe/article/9/12/3282/4644453
14.0173	Pst	2014-05-08	Europe	UK	Cambridgeshire	Kranich	PstS7	ERS1327211	-	Bueno-Sancho et al., 2017	Pathogenomic Analysis of Wheat Yellow Rust Lineages Detects Seasonal Variation and Host Specificity	Genome Biol Evol (12), 3282-3296 (2017)	https://academic.oup.com/gbe/article/9/12/3282/4644453
14.0174	Pst	2014-05-16	Europe	UK	Sturminster, Dorset	Solstice	PstS10	ERS1327212	-	Bueno-Sancho et al., 2017	Pathogenomic Analysis of Wheat Yellow Rust Lineages Detects Seasonal Variation and Host Specificity	Genome Biol Evol (12), 3282-3296 (2017)	https://academic.oup.com/gbe/article/9/12/3282/4644453
14.0175	Pst	2014-05-23	Europe	UK	Canterbury, Kent	Claire	PstS10	ERS1327213	-	Bueno-Sancho et al., 2017	Pathogenomic Analysis of Wheat Yellow Rust Lineages Detects Seasonal Variation and Host Specificity	Genome Biol Evol (12), 3282-3296 (2017)	https://academic.oup.com/gbe/article/9/12/3282/4644453
14.0176	Pst	2014-05-16	Europe	UK	Keisby, Lincolnshire	Belvoir	PstS10	ERS1327214	-	Bueno-Sancho et al., 2017	Pathogenomic Analysis of Wheat Yellow Rust Lineages Detects Seasonal Variation and Host Specificity	Genome Biol Evol (12), 3282-3296 (2017)	https://academic.oup.com/gbe/article/9/12/3282/4644453
14.0179	Pst	2014-05-23	Europe	UK	Canterbury, Kent	KWS Sterling	PstS10	ERS1327215	-	Bueno-Sancho et al., 2017	Pathogenomic Analysis of Wheat Yellow Rust Lineages Detects Seasonal Variation and Host Specificity	Genome Biol Evol (12), 3282-3296 (2017)	https://academic.oup.com/gbe/article/9/12/3282/4644453
14.0180	Pst	2014-05-23	Europe	UK	Canterbury, Kent	Robigus	PstS10	ERS1327216	-	Bueno-Sancho et al., 2017	Pathogenomic Analysis of Wheat Yellow Rust Lineages Detects Seasonal Variation and Host Specificity	Genome Biol Evol (12), 3282-3296 (2017)	https://academic.oup.com/gbe/article/9/12/3282/4644453
14.0181	Pst	2014-05-06	Europe	UK	Headley Hall, North Yorkshire	Oakley	PstS10	ERS1327217	-	Bueno-Sancho et al., 2017	Pathogenomic Analysis of Wheat Yellow Rust Lineages Detects Seasonal Variation and Host Specificity	Genome Biol Evol (12), 3282-3296 (2017)	https://academic.oup.com/gbe/article/9/12/3282/4644453
14.0182	Pst	2014-05-23	Europe	UK	Royston, Cambridgeshire	Oakley	PstS10	ERS1327218	-	Bueno-Sancho et al., 2017	Pathogenomic Analysis of Wheat Yellow Rust Lineages Detects Seasonal Variation and Host Specificity	Genome Biol Evol (12), 3282-3296 (2017)	https://academic.oup.com/gbe/article/9/12/3282/4644453
14.0195	Pst	2014-05-01	Europe	UK	Fulbourn, Cambridgeshire	Galiant	PstS10	ERS1327224	-	Bueno-Sancho et al., 2017	Pathogenomic Analysis of Wheat Yellow Rust Lineages Detects Seasonal Variation and Host Specificity	Genome Biol Evol (12), 3282-3296 (2017)	https://academic.oup.com/gbe/article/9/12/3282/4644453
14.0216	Pst	2014-05-01	Europe	UK	Morley, Norfolk	Oakley	PstS10	ERS1327229	-	Bueno-Sancho et al., 2017	Pathogenomic Analysis of Wheat Yellow Rust Lineages Detects Seasonal Variation and Host Specificity	Genome Biol Evol (12), 3282-3296 (2017)	https://academic.oup.com/gbe/article/9/12/3282/4644453
14.0225	Pst	2014-08-13	Europe	UK	Cascob, Powys	AC Barrie	PstS10	ERS1327231	Rosemary Bayles	Bueno-Sancho et al., 2017	Pathogenomic Analysis of Wheat Yellow Rust Lineages Detects Seasonal Variation and Host Specificity	Genome Biol Evol (12), 3282-3296 (2017)	https://academic.oup.com/gbe/article/9/12/3282/4644453
14.0227	Pst	2014-08-13	Europe	UK	Cascob, Powys	AC Barrie	PstS10	ERS1327233	Rosemary Bayles	Bueno-Sancho et al., 2017	Pathogenomic Analysis of Wheat Yellow Rust Lineages Detects Seasonal Variation and Host Specificity	Genome Biol Evol (12), 3282-3296 (2017)	https://academic.oup.com/gbe/article/9/12/3282/4644453
14.0236	Pst	2014-12-01	Africa	Ethiopia	Sinana	-	Other	ERS1327113	Dave Hodson	Bueno-Sancho et al., 2017	Pathogenomic Analysis of Wheat Yellow Rust Lineages Detects Seasonal Variation and Host Specificity	Genome Biol Evol (12), 3282-3296 (2017)	https://academic.oup.com/gbe/article/9/12/3282/4644453
14.0238	Pst	2014-12-01	Africa	Ethiopia	Sinana	Hidase	Other	ERS1327115	Dave Hodson	Bueno-Sancho et al., 2017	Pathogenomic Analysis of Wheat Yellow Rust Lineages Detects Seasonal Variation and Host Specificity	Genome Biol Evol (12), 3282-3296 (2017)	https://academic.oup.com/gbe/article/9/12/3282/4644453
14.0239	Pst	2014-12-01	Africa	Ethiopia	Sinana	Henkolo	Other	ERS1327116	Dave Hodson	Bueno-Sancho et al., 2017	Pathogenomic Analysis of Wheat Yellow Rust Lineages Detects Seasonal Variation and Host Specificity	Genome Biol Evol (12), 3282-3296 (2017)	https://academic.oup.com/gbe/article/9/12/3282/4644453
14/K12	Pst	2014	Africa	Kenya	-	-	Triticum aestivum	ERS4277113	-	van Schalkwyk et al., 2021	Pathogenomic analyses of Puccinia striiformis f. sp. tritici supports a close genetic relationship between South and East Africa	Plant Pathology (2)	https://doi.org/10.1111/ppa.13468
14/K7	Pst	2014	Africa	Kenya	-	-	Triticum aestivum	ERS4277108	-	van Schalkwyk et al., 2021	Pathogenomic analyses of Puccinia striiformis f. sp. tritici supports a close genetic relationship between South and East Africa	Plant Pathology (2)	https://doi.org/10.1111/ppa.13468
14/K8	Pst	2014	Africa	Kenya	-	-	Triticum aestivum	ERS4277109	-	van Schalkwyk et al., 2021	Pathogenomic analyses of Puccinia striiformis f. sp. tritici supports a close genetic relationship between South and East Africa	Plant Pathology (2)	https://doi.org/10.1111/ppa.13468
14/K9	Pst	2014	Africa	Kenya	-	-	Triticum aestivum	ERS4277110	-	van Schalkwyk et al., 2021	Pathogenomic analyses of Puccinia striiformis f. sp. tritici supports a close genetic relationship between South and East Africa	Plant Pathology (2)	https://doi.org/10.1111/ppa.13468
14/SADL2	Pst	2014-08-23	Africa	South Africa	Ouplaas	-	Triticum aestivum	ERS4277122	-	van Schalkwyk et al., 2021	Pathogenomic analyses of Puccinia striiformis f. sp. tritici supports a close genetic relationship between South and East Africa	Plant Pathology (2)	https://doi.org/10.1111/ppa.13468
14/SADL5	Pst	2014-09-04	Africa	South Africa	Bredasdorp	-	Triticum aestivum	ERS4277124	-	van Schalkwyk et al., 2021	Pathogenomic analyses of Puccinia striiformis f. sp. tritici supports a close genetic relationship between South and East Africa	Plant Pathology (2)	https://doi.org/10.1111/ppa.13468
15.0190	Pst	2015-06-04	Europe	France	Castanet	Triticale Tarzan	Triticale	ERS3172966	J P Legoff	Radhakrishnan et al., 2019	Mobile and real-time plant disease (MARPLE) diagnostics for strain-level identification of complex fungal pathogens	BMC Biology	https://www.ncbi.nlm.nih.gov/pubmed/31405370
15.0305	Pst	2015-04-22	North America	USA	Wichita, Kansas	Tam 112	Other	ERS3172994	Marla Barnett	Radhakrishnan et al., 2019	Mobile and real-time plant disease (MARPLE) diagnostics for strain-level identification of complex fungal pathogens	BMC Biology	https://www.ncbi.nlm.nih.gov/pubmed/31405370
15.0306	Pst	2015-04-22	North America	USA	Wichita, Kansas	Everest	Other	ERS3172995	Marla Barnett	Radhakrishnan et al., 2019	Mobile and real-time plant disease (MARPLE) diagnostics for strain-level identification of complex fungal pathogens	BMC Biology	https://www.ncbi.nlm.nih.gov/pubmed/31405370
15.0308	Pst	2015-04-30	North America	USA	Cash, Arkansas	LCS 2141	Other	ERS3172996	Marla Barnett	Radhakrishnan et al., 2019	Mobile and real-time plant disease (MARPLE) diagnostics for strain-level identification of complex fungal pathogens	BMC Biology	https://www.ncbi.nlm.nih.gov/pubmed/31405370
15.0350	Pst	2015-06-03	North America	USA	Siskiyou, California	YS 221	Other	ERS3172974	Xianming Cheng	Radhakrishnan et al., 2019	Mobile and real-time plant disease (MARPLE) diagnostics for strain-level identification of complex fungal pathogens	BMC Biology	https://www.ncbi.nlm.nih.gov/pubmed/31405370
15.0353	Pst	2015-05-26	North America	USA	Cimarron, Oklahoma	Byrd	Other	ERS3172976	Xianming Cheng	Radhakrishnan et al., 2019	Mobile and real-time plant disease (MARPLE) diagnostics for strain-level identification of complex fungal pathogens	BMC Biology	https://www.ncbi.nlm.nih.gov/pubmed/31405370
15.0354	Pst	2015-06-11	North America	USA	Endicott, Washington	-	Other	ERS3172977	Xianming Cheng	Radhakrishnan et al., 2019	Mobile and real-time plant disease (MARPLE) diagnostics for strain-level identification of complex fungal pathogens	BMC Biology	https://www.ncbi.nlm.nih.gov/pubmed/31405370
15.0355	Pst	2015-06-11	North America	USA	St. John, Washington	-	Other	ERS3172978	Xianming Cheng	Radhakrishnan et al., 2019	Mobile and real-time plant disease (MARPLE) diagnostics for strain-level identification of complex fungal pathogens	BMC Biology	https://www.ncbi.nlm.nih.gov/pubmed/31405370
15.0356	Pst	2015-06-10	North America	USA	Gregory, South Dakota	-	Other	ERS3172979	Xianming Cheng	Radhakrishnan et al., 2019	Mobile and real-time plant disease (MARPLE) diagnostics for strain-level identification of complex fungal pathogens	BMC Biology	https://www.ncbi.nlm.nih.gov/pubmed/31405370
15.0357	Pst	2015-06-09	North America	USA	Ririe, Idaho	Deloris	Other	ERS3172980	Xianming Cheng	Radhakrishnan et al., 2019	Mobile and real-time plant disease (MARPLE) diagnostics for strain-level identification of complex fungal pathogens	BMC Biology	https://www.ncbi.nlm.nih.gov/pubmed/31405370
15.0359	Pst	2015-06-24	North America	USA	Walla Walla, Washington	Express	Other	ERS3172981	Xianming Cheng	Radhakrishnan et al., 2019	Mobile and real-time plant disease (MARPLE) diagnostics for strain-level identification of complex fungal pathogens	BMC Biology	https://www.ncbi.nlm.nih.gov/pubmed/31405370
15.0360	Pst	2015-06-29	North America	USA	Tripp, South Dakota	-	Other	ERS3172982	Xianming Cheng	Radhakrishnan et al., 2019	Mobile and real-time plant disease (MARPLE) diagnostics for strain-level identification of complex fungal pathogens	BMC Biology	https://www.ncbi.nlm.nih.gov/pubmed/31405370
15.0361	Pst	2015-07-02	North America	USA	Box Butte, Nebraska	-	Other	ERS3172983	Xianming Cheng	Radhakrishnan et al., 2019	Mobile and real-time plant disease (MARPLE) diagnostics for strain-level identification of complex fungal pathogens	BMC Biology	https://www.ncbi.nlm.nih.gov/pubmed/31405370
15.0363	Pst	2015-04-10	North America	USA	Mt. Vernon, Washington	PS 279	Other	ERS3172984	Xianming Cheng	Radhakrishnan et al., 2019	Mobile and real-time plant disease (MARPLE) diagnostics for strain-level identification of complex fungal pathogens	BMC Biology	https://www.ncbi.nlm.nih.gov/pubmed/31405370
15.0573	Pst	2015-07-01	Asia	China	-	-	Other	ERS3172986	Suomeng Song	Radhakrishnan et al., 2019	Mobile and real-time plant disease (MARPLE) diagnostics for strain-level identification of complex fungal pathogens	BMC Biology	https://www.ncbi.nlm.nih.gov/pubmed/31405370
15.0574	Pst	2015-07-01	Asia	China	-	-	Other	ERS3172987	Suomeng Song	Radhakrishnan et al., 2019	Mobile and real-time plant disease (MARPLE) diagnostics for strain-level identification of complex fungal pathogens	BMC Biology	https://www.ncbi.nlm.nih.gov/pubmed/31405370
15.0579	Pst	2015-07-01	Asia	China	-	-	Other	ERS3172988	Suomeng Song	Radhakrishnan et al., 2019	Mobile and real-time plant disease (MARPLE) diagnostics for strain-level identification of complex fungal pathogens	BMC Biology	https://www.ncbi.nlm.nih.gov/pubmed/31405370
15.0596	Pst	2015-07-21	North America	Canada	Lethbridge, Alberta	GYT3-190 DN	Other	ERS3172989	Harpinder S. Randhawa	Radhakrishnan et al., 2019	Mobile and real-time plant disease (MARPLE) diagnostics for strain-level identification of complex fungal pathogens	BMC Biology	https://www.ncbi.nlm.nih.gov/pubmed/31405370
15.0597	Pst	2015-07-21	North America	Canada	Lethbridge, Alberta	Morocco FF-B	Other	ERS3172990	Harpinder S. Randhawa	Radhakrishnan et al., 2019	Mobile and real-time plant disease (MARPLE) diagnostics for strain-level identification of complex fungal pathogens	BMC Biology	https://www.ncbi.nlm.nih.gov/pubmed/31405370
15.0604	Pst	2015-07-21	North America	Canada	Lethbridge, Alberta	Penhold	Other	ERS3172991	Harpinder S. Randhawa	Radhakrishnan et al., 2019	Mobile and real-time plant disease (MARPLE) diagnostics for strain-level identification of complex fungal pathogens	BMC Biology	https://www.ncbi.nlm.nih.gov/pubmed/31405370
15.0606	Pst	2015-07-21	North America	Canada	Lacombe, Alberta	HY2047	Other	ERS3172992	Harpinder S. Randhawa	Radhakrishnan et al., 2019	Mobile and real-time plant disease (MARPLE) diagnostics for strain-level identification of complex fungal pathogens	BMC Biology	https://www.ncbi.nlm.nih.gov/pubmed/31405370
15.0608	Pst	2015-07-21	North America	Canada	St. Albert, Alberta	HY2042	Other	ERS3172985	Harpinder S. Randhawa	Radhakrishnan et al., 2019	Mobile and real-time plant disease (MARPLE) diagnostics for strain-level identification of complex fungal pathogens	BMC Biology	https://www.ncbi.nlm.nih.gov/pubmed/31405370
15.0609	Pst	2015-07-21	North America	Canada	Lacombe, Alberta	Yr31	Other	ERS3172993	Harpinder S. Randhawa	Radhakrishnan et al., 2019	Mobile and real-time plant disease (MARPLE) diagnostics for strain-level identification of complex fungal pathogens	BMC Biology	https://www.ncbi.nlm.nih.gov/pubmed/31405370
16.0142	Pst	2016-05-12	North America	USA	Walla Walla, Washington	LCS Jet	Other	ERS3173005	Jeron Chatelain	Radhakrishnan et al., 2019	Mobile and real-time plant disease (MARPLE) diagnostics for strain-level identification of complex fungal pathogens	BMC Biology	https://www.ncbi.nlm.nih.gov/pubmed/31405370
16.0145	Pst	2016-05-17	North America	USA	Lafayette, Indiana	DH13SRW024-182	Other	ERS3173006	Tracy Richards	Radhakrishnan et al., 2019	Mobile and real-time plant disease (MARPLE) diagnostics for strain-level identification of complex fungal pathogens	BMC Biology	https://www.ncbi.nlm.nih.gov/pubmed/31405370
16.0186	Pst	2016-05-26	Europe	Sweden	Svalov	Linus	PstS8	ERS3173002	Tina Henriksen	Radhakrishnan et al., 2019	Mobile and real-time plant disease (MARPLE) diagnostics for strain-level identification of complex fungal pathogens	BMC Biology	https://www.ncbi.nlm.nih.gov/pubmed/31405370
16.0555	Pst	2016-05-23	North America	USA	Lansing, Michigan	K505hw14	Other	ERS3172910	Xianming Cheng	Radhakrishnan et al., 2019	Mobile and real-time plant disease (MARPLE) diagnostics for strain-level identification of complex fungal pathogens	BMC Biology	https://www.ncbi.nlm.nih.gov/pubmed/31405370
16.0771	Pst	2016-10-18	Africa	South Africa	Napier	-	Triticale	ERS3172911	Driecus Lesch	Radhakrishnan et al., 2019	Mobile and real-time plant disease (MARPLE) diagnostics for strain-level identification of complex fungal pathogens	BMC Biology	https://www.ncbi.nlm.nih.gov/pubmed/31405370
16.0779	Pst	2016-12-05	Africa	Ethiopia	Sinana	SPPSN#15	Other	ERS3172916	Ayele and Bekele	Radhakrishnan et al., 2019	Mobile and real-time plant disease (MARPLE) diagnostics for strain-level identification of complex fungal pathogens	BMC Biology	https://www.ncbi.nlm.nih.gov/pubmed/31405370
16.0783	Pst	2016-11-26	Asia	China	Nanhu, Jiaxing	-	Other	ERS3172918	-	Radhakrishnan et al., 2019	Mobile and real-time plant disease (MARPLE) diagnostics for strain-level identification of complex fungal pathogens	BMC Biology	https://www.ncbi.nlm.nih.gov/pubmed/31405370
16.0788	Pst	2016-11-27	Asia	China	Pingnan, Guizhou	-	Other	ERS3172921	-	Radhakrishnan et al., 2019	Mobile and real-time plant disease (MARPLE) diagnostics for strain-level identification of complex fungal pathogens	BMC Biology	https://www.ncbi.nlm.nih.gov/pubmed/31405370
16.0790	Pst	2016-11-27	Asia	China	Pingnan, Guizhou	-	Other	ERS3172923	-	Radhakrishnan et al., 2019	Mobile and real-time plant disease (MARPLE) diagnostics for strain-level identification of complex fungal pathogens	BMC Biology	https://www.ncbi.nlm.nih.gov/pubmed/31405370
16.0803	Pst	2016-11-28	Asia	China	Jinshan, Gangu	-	Other	ERS3172934	-	Radhakrishnan et al., 2019	Mobile and real-time plant disease (MARPLE) diagnostics for strain-level identification of complex fungal pathogens	BMC Biology	https://www.ncbi.nlm.nih.gov/pubmed/31405370
16.0804	Pst	2016-11-28	Asia	China	Jinshan, Gangu	-	Other	ERS3172935	-	Radhakrishnan et al., 2019	Mobile and real-time plant disease (MARPLE) diagnostics for strain-level identification of complex fungal pathogens	BMC Biology	https://www.ncbi.nlm.nih.gov/pubmed/31405370
17.0007	Pst	2017-04-11	North America	USA	Altus, Oklahoma	Snowmass	Other	ERS3172937	Marla Barnett	Radhakrishnan et al., 2019	Mobile and real-time plant disease (MARPLE) diagnostics for strain-level identification of complex fungal pathogens	BMC Biology	https://www.ncbi.nlm.nih.gov/pubmed/31405370
17.0023	Pst	2017-05-25	North America	USA	Lafayette, Indiana	NC13142-36	Other	ERS3172942	Tracy Richards	Radhakrishnan et al., 2019	Mobile and real-time plant disease (MARPLE) diagnostics for strain-level identification of complex fungal pathogens	BMC Biology	https://www.ncbi.nlm.nih.gov/pubmed/31405370
17.0057	Pst	2017-06-13	North America	USA	Walla Walla, Washington	Otto	Other	ERS3172947	Jay Kalous	Radhakrishnan et al., 2019	Mobile and real-time plant disease (MARPLE) diagnostics for strain-level identification of complex fungal pathogens	BMC Biology	https://www.ncbi.nlm.nih.gov/pubmed/31405370
17.0058	Pst	2017-06-13	North America	USA	Walla Walla, Washington	Artdeco	Other	ERS3172948	Jay Kalous	Radhakrishnan et al., 2019	Mobile and real-time plant disease (MARPLE) diagnostics for strain-level identification of complex fungal pathogens	BMC Biology	https://www.ncbi.nlm.nih.gov/pubmed/31405370
17.0189	Pst	2017	Asia	China	-	-	Other	ERS3172951	-	Radhakrishnan et al., 2019	Mobile and real-time plant disease (MARPLE) diagnostics for strain-level identification of complex fungal pathogens	BMC Biology	https://www.ncbi.nlm.nih.gov/pubmed/31405370
17.0190	Pst	2017	Asia	China	-	-	Other	ERS3172952	-	Radhakrishnan et al., 2019	Mobile and real-time plant disease (MARPLE) diagnostics for strain-level identification of complex fungal pathogens	BMC Biology	https://www.ncbi.nlm.nih.gov/pubmed/31405370
17.0208	Pst	2017	Asia	China	-	-	Other	ERS3172961	-	Radhakrishnan et al., 2019	Mobile and real-time plant disease (MARPLE) diagnostics for strain-level identification of complex fungal pathogens	BMC Biology	https://www.ncbi.nlm.nih.gov/pubmed/31405370
17.0286	Pst	2017	Europe	UK	-	-	Other	ERS3172962	-	Radhakrishnan et al., 2019	Mobile and real-time plant disease (MARPLE) diagnostics for strain-level identification of complex fungal pathogens	BMC Biology	https://www.ncbi.nlm.nih.gov/pubmed/31405370
18.0167	Pst	2018-05-25	Africa	South Africa	Bloemfontein	JIC871	Triticum aestivum	ERS3526856	-	Boshoff et al., 2020	First Report of Puccinia striiformis f. sp. tritici, Causing Stripe Rust of Wheat, in Zimbabwe	Plant Disease	https://doi.org/10.1094/PDIS-07-19-1395-PDN
18.0169	Pst	2018-11-04	Africa	Lesotho	-	-	Triticum aestivum	ERS3526857	-	Boshoff et al., 2020	First Report of Puccinia striiformis f. sp. tritici, Causing Stripe Rust of Wheat, in Zimbabwe	Plant Disease	https://doi.org/10.1094/PDIS-07-19-1395-PDN
18.0171	Pst	2018-11-04	Africa	South Africa	Western Cape	Palmiet	Triticum aestivum	ERS3526858	-	Boshoff et al., 2020	First Report of Puccinia striiformis f. sp. tritici, Causing Stripe Rust of Wheat, in Zimbabwe	Plant Disease	https://doi.org/10.1094/PDIS-07-19-1395-PDN
18.0172	Pst	2018-11-04	Africa	South Africa	Sutherland	Wild Rye	Secale cereale	ERS3526859	-	Boshoff et al., 2020	First Report of Puccinia striiformis f. sp. tritici, Causing Stripe Rust of Wheat, in Zimbabwe	Plant Disease	https://doi.org/10.1094/PDIS-07-19-1395-PDN
18.0178	Pst	2018-11-04	Africa	Zimbabwe	-	Nduna	Triticum aestivum	ERS3526863	-	Boshoff et al., 2020	First Report of Puccinia striiformis f. sp. tritici, Causing Stripe Rust of Wheat, in Zimbabwe	Plant Disease	https://doi.org/10.1094/PDIS-07-19-1395-PDN
18.0183	Pst	2018-11-04	Africa	Zimbabwe	-	Nduna	Triticum aestivum	ERS3526864	-	Boshoff et al., 2020	First Report of Puccinia striiformis f. sp. tritici, Causing Stripe Rust of Wheat, in Zimbabwe	Plant Disease	https://doi.org/10.1094/PDIS-07-19-1395-PDN
23.0001	Pst	2023-05-08	Europe	Serbia	Rimski sancevi	NS 3-9316	Other	ERR13340220	Radivoje Jevtic	This study
23.0002	Pst	2023-05-08	Europe	Serbia	Rimski sancevi	Natasa	Other	ERR13340221	Radivoje Jevtic	This study
23.0003	Pst	2023-05-09	Europe	Serbia	Rimski sancevi	Zvezdana	Other	ERR13340222	Radivoje Jevtic	This study
23.0005	Pst	2023-05-05	Europe	Serbia	Nikinci	Simonida	Other	ERR13340223	Radivoje Jevtic	This study
23.0006	Pst	2023-04-27	Europe	Serbia	Turija	Zvezdana	Other	ERR13340224	Radivoje Jevtic	This study
23.0007	Pst	2023-04-27	Europe	Serbia	Srbobran	Igra	Other	ERR13340225	Radivoje Jevtic	This study
23.0008	Pst	2023-04-27	Europe	Serbia	Turija	Zvezdana	Other	ERR13340226	Radivoje Jevtic	This study
23.0009	Pst	2023-04-27	Europe	Serbia	Turija	NS Obala	Other	ERR13340227	Radivoje Jevtic	This study
23.0010	Pst	2023-05-13	Europe	Serbia	Obrenovac	NS Obala	Other	ERR13340228	Radivoje Jevtic	This study
23.0011	Pst	2023-05-13	Europe	Serbia	Obrenovac	Simonida	Other	ERR13340229	Radivoje Jevtic	This study
23.0012	Pst	2023-05-13	Europe	Serbia	Mrdjenovac	LG Apilco	Other	ERR13340230	Radivoje Jevtic	This study
23.0013	Pst	2023-05-18	Europe	Serbia	Rimski sancevi	Zvezdana	Other	ERR13340231	Radivoje Jevtic	This study
23.0014	Pst	2023-05-08	Europe	Serbia	Rimski sancevi	Odisej	Triticale	ERR13340232	Radivoje Jevtic	This study
23.0015	Pst	2023-05-18	Europe	Serbia	Rimski sancevi	NS Obala	Other	ERR13340233	Radivoje Jevtic	This study
23.0016	Pst	2023-05-18	Europe	Serbia	Rimski sancevi	CD 42	Triticale	ERR13340234	Radivoje Jevtic	This study
23.0017	Pst	2023-05-18	Europe	Serbia	Rimski sancevi	ST 80	Triticale	ERR13340235	Radivoje Jevtic	This study
23.0018	Pst	2023-05-18	Europe	Serbia	Rimski sancevi	CD 38	Triticale	ERR13340236	Radivoje Jevtic	This study
23.0019	Pst	2023-05-18	Europe	Serbia	Rimski sancevi	CD 75	Triticale	ERR13340237	Radivoje Jevtic	This study
23.0021	Pst	2022-05-23	Europe	Serbia	Rimski sancevi	Bambi	Other	ERR13340238	Radivoje Jevtic	This study
23.0022	Pst	2022-05-23	Europe	Serbia	Rimski sancevi	NS Karnak	Triticale	ERR13340239	Radivoje Jevtic	This study
23.0023	Pst	2022-05-23	Europe	Serbia	Rimski sancevi	NS40S	Other	ERR13340240	Radivoje Jevtic	This study
23.0024	Pst	2022-05-23	Europe	Serbia	Rimski sancevi	Pobeda	Other	ERR13340241	Radivoje Jevtic	This study
23.0025	Pst	2022-05-23	Europe	Serbia	Rimski sancevi	Nirvana	Spelta	ERR13340242	Radivoje Jevtic	This study
23.0026	Pst	2022-05-23	Europe	Serbia	Rimski sancevi	Dolap	Other	ERR13340243	Radivoje Jevtic	This study
23.0027	Pst	2022-05-23	Europe	Serbia	Rimski sancevi	NS Obala	Other	ERR13340244	Radivoje Jevtic	This study
23.0028	Pst	2022-05-23	Europe	Serbia	Rimski sancevi	NS 54-20	Other	ERR13340245	Radivoje Jevtic	This study
88.45SS	Pst	1988	Europe	UK	-	-	UK 1978-2011	SRR1534385	-	Hubbard et al., 2015	Field pathogenomics reveals the emergence of a diverse wheat yellow rust population	Genome Biol. (1): 23 (2015)	https://genomebiology.biomedcentral.com/articles/10.1186/s13059-015-0590-8
ATR-1	Pst	2014-05-13	Asia	Pakistan	Attarshisha	-	Other	ERS1327099	-	Bueno-Sancho et al., 2017	Pathogenomic Analysis of Wheat Yellow Rust Lineages Detects Seasonal Variation and Host Specificity	Genome Biol Evol (12), 3282-3296 (2017)	https://academic.oup.com/gbe/article/9/12/3282/4644453
ATR-2	Pst	2014-05-13	Asia	Pakistan	Attarshisha	-	Other	ERS1327100	-	Bueno-Sancho et al., 2017	Pathogenomic Analysis of Wheat Yellow Rust Lineages Detects Seasonal Variation and Host Specificity	Genome Biol Evol (12), 3282-3296 (2017)	https://academic.oup.com/gbe/article/9/12/3282/4644453
ATR-3	Pst	2014-05-13	Asia	Pakistan	Attarshisha	-	Other	ERS1327101	-	Bueno-Sancho et al., 2017	Pathogenomic Analysis of Wheat Yellow Rust Lineages Detects Seasonal Variation and Host Specificity	Genome Biol Evol (12), 3282-3296 (2017)	https://academic.oup.com/gbe/article/9/12/3282/4644453
Chile_31	Pst	2014-12-07	South America	Chile	Los Tilos	Fito 1404-15	Other	ERS1327106	Ricardo Madariaga Burrows	Bueno-Sancho et al., 2017	Pathogenomic Analysis of Wheat Yellow Rust Lineages Detects Seasonal Variation and Host Specificity	Genome Biol Evol (12), 3282-3296 (2017)	https://academic.oup.com/gbe/article/9/12/3282/4644453
Chile_4	Pst	2014-11-24	South America	Chile	Santa Rosa	Onix	Other	ERS1327103	Ricardo Madariaga Burrows	Bueno-Sancho et al., 2017	Pathogenomic Analysis of Wheat Yellow Rust Lineages Detects Seasonal Variation and Host Specificity	Genome Biol Evol (12), 3282-3296 (2017)	https://academic.oup.com/gbe/article/9/12/3282/4644453
CL1	Pst	2013-06-06	Europe	UK	Rockland St Mary, Norfolk	Triticale	Triticale	SRX690542	Clare Lewis	Hubbard et al., 2015	Field pathogenomics reveals the emergence of a diverse wheat yellow rust population	Genome Biol. (1): 23 (2015)	https://genomebiology.biomedcentral.com/articles/10.1186/s13059-015-0590-8
FW1	Pst	2013	Europe	France	-	-	France 1988-2013	ERS1327095	-	Hubbard et al., 2015	Field pathogenomics reveals the emergence of a diverse wheat yellow rust population	Genome Biol. (1): 23 (2015)	https://genomebiology.biomedcentral.com/articles/10.1186/s13059-015-0590-8
Qld-1	Pst	2014-05-16	Asia	Pakistan	Abbottabad	-	Other	ERS1327096	-	Bueno-Sancho et al., 2017	Pathogenomic Analysis of Wheat Yellow Rust Lineages Detects Seasonal Variation and Host Specificity	Genome Biol Evol (12), 3282-3296 (2017)	https://academic.oup.com/gbe/article/9/12/3282/4644453
Qld-2	Pst	2014-05-16	Asia	Pakistan	Abbottabad	-	Other	ERS1327097	-	Bueno-Sancho et al., 2017	Pathogenomic Analysis of Wheat Yellow Rust Lineages Detects Seasonal Variation and Host Specificity	Genome Biol Evol (12), 3282-3296 (2017)	https://academic.oup.com/gbe/article/9/12/3282/4644453
Qld-3	Pst	2014-05-16	Asia	Pakistan	Qalandarabad	-	Other	ERS1327098	-	Bueno-Sancho et al., 2017	Pathogenomic Analysis of Wheat Yellow Rust Lineages Detects Seasonal Variation and Host Specificity	Genome Biol Evol (12), 3282-3296 (2017)	https://academic.oup.com/gbe/article/9/12/3282/4644453
RB1	Pst	2014	Europe	UK	Cambridgeshire	Oakley	PstS7	SRX702551	-	Hubbard et al., 2015	Field pathogenomics reveals the emergence of a diverse wheat yellow rust population	Genome Biol. (1): 23 (2015)	https://genomebiology.biomedcentral.com/articles/10.1186/s13059-015-0590-8
RB2	Pst	2014	Europe	UK	Cambridgeshire	Torch	PstS7	SRX702556	-	Hubbard et al., 2015	Field pathogenomics reveals the emergence of a diverse wheat yellow rust population	Genome Biol. (1): 23 (2015)	https://genomebiology.biomedcentral.com/articles/10.1186/s13059-015-0590-8
T13/1	Pst	2013-06-26	Europe	UK	Headley Hall, North Yorkshire	Triticale Phidahlia	Triticale	SRX702404	-	Hubbard et al., 2015	Field pathogenomics reveals the emergence of a diverse wheat yellow rust population	Genome Biol. (1): 23 (2015)	https://genomebiology.biomedcentral.com/articles/10.1186/s13059-015-0590-8
T13/2	Pst	2013-07-05	Europe	UK	Wareham, Dorset	Triticale Amarillo	Triticale	SRX702423	-	Hubbard et al., 2015	Field pathogenomics reveals the emergence of a diverse wheat yellow rust population	Genome Biol. (1): 23 (2015)	https://genomebiology.biomedcentral.com/articles/10.1186/s13059-015-0590-8
T13/3	Pst	2013-07-05	Europe	UK	Wool, Dorset	Triticale Bennette	Triticale	SRX702533	-	Hubbard et al., 2015	Field pathogenomics reveals the emergence of a diverse wheat yellow rust population	Genome Biol. (1): 23 (2015)	https://genomebiology.biomedcentral.com/articles/10.1186/s13059-015-0590-8
